# Supplementary material for: Reprogramming of Lipid Metabolism as a New Driving Force Behind Tauroursodeoxycholic Acid-Induced Neural Stem Cell Proliferation
Source: PubMed Central journal article supplement (PMC7286385; doi:10.3389/fcell.2020.00335), 2020-05-26

Supplementary table 1

| Protein                                  | Uniprot Accession Code | Identification Score* | Number of unique peptides | Sequence Coverage (%) |
|------------------------------------------|------------------------|-----------------------|---------------------------|-----------------------|
| Long-chain acyl-CoA dehydrogenase (LCAD) | P51174                 | 323                   | 16                        | 36                    |
| Ornithine aminotransferase (OAT)         | Q3UKT3                 | 215                   | 20                        | 49                    |
| Aldehyde dehydrogenase 2 (ALDH2)         | Q544B1                 | 178                   | 16                        | 32                    |
| Acetyl-CoA acetyltransferase (ACAT1)     | Q8QZT1                 | 323                   | 16                        | 44                    |

\*Identification score was calculated by MaxQuant and it is derived from peptide posterior error probabilities.

Supplementary figure S1

S1A

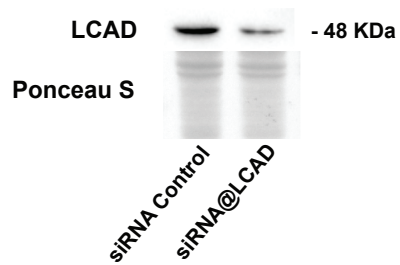

S1B

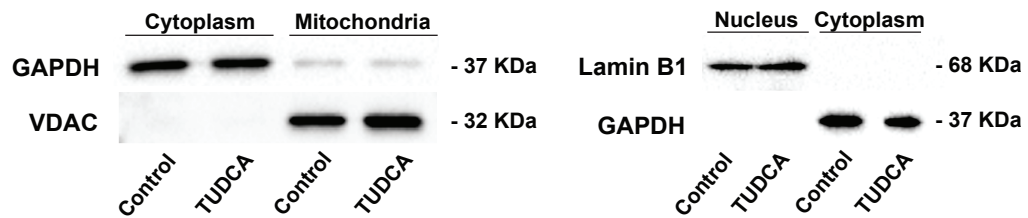

S1C

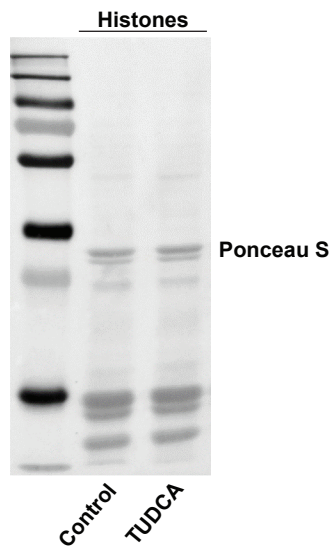

Supplement: Data_Sheet_1.pdf [file Data_Sheet_1.pdf]
